# Supplementary material for: GOLUM-CNP v1.0: a data-driven modeling of carbon, nitrogen and phosphorus cycles in major terrestrial biomes
Source: Copernicus journal article supplement (doi:10.5194/gmd-11-3903-2018), 2018-09-27
Supplement: Supplementary file 1 [file gmd-11-3903-2018-supplement.zip]

Archive with 7 entries (6 files):
- GMD_SI_revise.pdf
- gmd-11-3903-2018-supplement-title-page.pdf
- GOLUM-CNP_v1.0/
- GOLUM-CNP_v1.0/ncload.py
- GOLUM-CNP_v1.0/SteadyState_pixel.py
- GOLUM-CNP_v1.0/README
- GOLUM-CNP_v1.0/Globe_SteadyState.py
