# Supplementary material for: GOLUM-CNP v1.0: a data-driven modeling of carbon, nitrogen and phosphorus cycles in major terrestrial biomes
Source: Copernicus journal article supplement (doi:10.5194/gmd-11-3903-2018), 2018-09-27
Supplement: Supplementary file 1 [file gmd-11-3903-2018-supplement.zip › gmd-11-3903-2018-supplement-title-page.pdf]

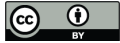

## *Supplement of*

# **GOLUM-CNP v1.0: a data-driven modeling of carbon, nitrogen and phosphorus cycles in major terrestrial biomes**

**Yilong Wang et al.**

*Correspondence to:* Yilong Wang (yilong.wang@lsce.ipsl.fr)

- `gmd-11-3903-2018-supplement-title-page.pdf`
- `GMD_SI_revise.pdf`
- `GOLUM-CNP_v1.0`
  - `Globe_SteadyState.py`
  - `README`
  - `SteadyState_pixel.py`
  - `ncload.py`

The copyright of individual parts of the supplement might differ from the CC BY 4.0 License.
