# Supplementary material for: GOLUM-CNP v1.0: a data-driven modeling of carbon, nitrogen and phosphorus cycles in major terrestrial biomes
Source: Copernicus journal article supplement (doi:10.5194/gmd-11-3903-2018), 2018-09-27
Supplement: Supplementary file 1 [file gmd-11-3903-2018-supplement.zip › GMD_SI_revise.pdf]

Supporting information of “GOLUM-CNP v1.0: a data-driven modeling of carbon, nitrogen and phosphorus cycles in major terrestrial biomes” by Yilong Wang, Philippe Ciais, Daniel Goll, Yuanyuan Huang, Yiqi Luo, Ying-Ping Wang, A. Anthony Bloom, Grégoire Broquet, Jens Hartmann, Shushi Peng, Josep Penuelas, Shilong Piao, Jordi Sardans, Benjamin D. Stocker, Rong Wang, Sönke Zaehle, Sophie Zechmeister-Boltenstern

### S1 Comparison of the “openness” in this study and in Cleveland et al. (2013)

In this section, we compare the computation of “openness” index used in this study versus “proportion of new NPP fueled by new nutrient inputs” used in Cleveland et al. (2013). We take the indexes for N as an example, but the computation of corresponding indexes for P are similar.

Assume NPP is allocated to leaf, wood and roots by 0.5, 0.3 and 0.2, those pools with C:N ratios of 25, 150 and 50. In Cleveland's index, N is allocated in fractions of 0.5, 0.3 and 0.2 in NPP-N ( $C_j$  can be moved before  $C_{toN_j}$  in their Eq. S7). The new NPP is  $(0.5 \times 25 + 0.3 \times 150 + 0.2 \times 50) \times I_N = 67.5 I_N$ , where  $I_N$  represent external nutrients inputs, i.e. the sum of deposition and biological fixation for N which is available to vegetation. They assume that the remaining NPP must be totally fueled by resorption and net mineralization in the soil. They modelled the amount of N resorption but computed the amount of mineralization as the difference between nutrient demand, new nutrient inputs, and nutrient resorption (their Eqs. S5). So the “proportion of new NPP fueled by new nutrient inputs” index in Cleveland et al. (2013) equals  $67.5 I_N / \text{NPP}$ .

In this study, the N allocation is  $0.5/25 : 0.3/150 : 0.2/50$ . Normalizing the values to ensure the sum of the fractions equals to 1 gives allocation fractions of N in NPP-N of  $0.77 : 0.08 : 0.15$ . Under steady state, we have the relationship that the total N demand =  $\text{NPP} \times 0.5/25 + \text{NPP} \times 0.3/150 + \text{NPP} \times 0.2/50 = F_N + \text{RSB}_N$ , where  $F_N$  is the uptake from inorganic N soil pool and  $\text{RSB}_N$  is the flux of resorbed N. As a result, the openness index  $\text{NO} = I_N / (F_N + \text{RSB}_N) = 38.5 I_N / \text{NPP}$ .

Because there is no evidence that how much the new N inputs is allocated in the vegetation, we chose to define the openness index only based on N and P fluxes rather than to convert N and P fluxes into NPP like Cleveland et al. (2013) did.

**Table S1** C:N, C:P and N:P molar (atomic) ratios across major biomes from Zechmeister-Boltenstern et al. (2015). Targeted biomes are: tropical rain forests (TRF), temperate deciduous forests (TEDF), temperate coniferous forests (TECF), boreal coniferous forests (BOCF), tundra (TUN), tropical/C4 grasslands (TRG), and temperate/C3 grasslands (TEG). Note that N:P ratios in Zechmeister-Boltenstern et al. (2015) are not exactly equal to the ratio of C:P to C:N, but the differences are small.

|     |         | TRF   | TEDF  | TECF  | BOCF  | TRG  | TEG  | TUN  |
|-----|---------|-------|-------|-------|-------|------|------|------|
| C:N | Foliage | 25    | 25    | 59    | 49    | 39   | 25   | 49   |
|     | Root    | 47    | 59    | 67    | 57    | 39   | 88   | 54   |
|     | Wood    | 148   | 471   | 844   | 525   | --   | --   | --   |
|     | Soil    | 16    | 19    | 20    | 32    | 25   | 10   | 13   |
| C:P | Foliage | 1027  | 867   | 1232  | 1049  | 753  | 1278 | 2167 |
|     | Root    | 3125  | 1962  | 1186  | 1574  | 1300 | 2829 | 1300 |
|     | Wood    | 13574 | 11179 | 24297 | 19734 | --   | --   | --   |
|     | Soil    | 159   | 366   | 302   | 960   | 509  | 130  | 138  |
| N:P | Foliage | 43    | 36    | 23    | 23    | 20   | 53   | 45   |
|     | Root    | 52    | 22    | 18    | 30    | 32   | 27   | 20   |
|     | Wood    | 93    | 24    | 29    | 38    | --   | --   | --   |
|     | Soil    | 13    | 20    | 15    | 31    | 31   | --   | 11   |

**Table S2** Mean residence time of C, N and P in ecosystems (unit: years). Targeted biomes are:

tropical rain forests (TRF), temperate deciduous forests (TEDF), temperate coniferous forests (TECF), boreal coniferous forests (BOCF), tundra (TUN), tropical/C4 grasslands (TRG), and temperate/C3 grasslands (TEG).

|   | TRF  | TEDF | TECF | BOCF | TRG  | TEG  | TUN  | Globe |
|---|------|------|------|------|------|------|------|-------|
| C | 29   | 49   | 48   | 106  | 40   | 67   | 101  | 38    |
| N | 382  | 1016 | 637  | 4834 | 987  | 3075 | 7896 | 1586  |
| P | 2520 | 3263 | 4413 | 6167 | 4483 | 6291 | 7077 | 6092  |

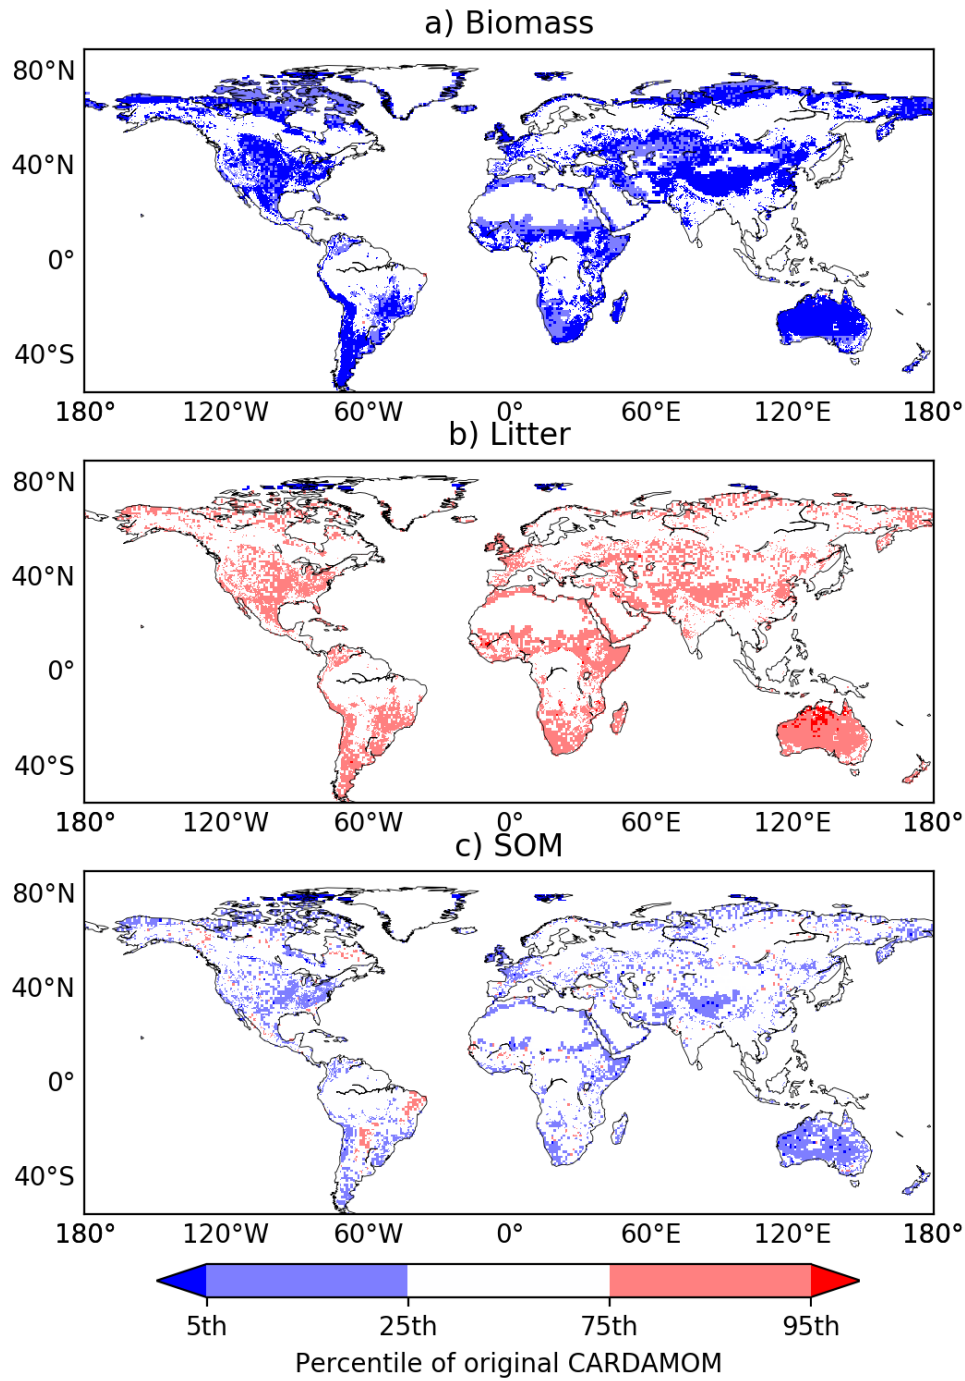

**Fig. S1** Comparison between C pool sizes of transformed steady-state C cycle and original CARDAMOM results.

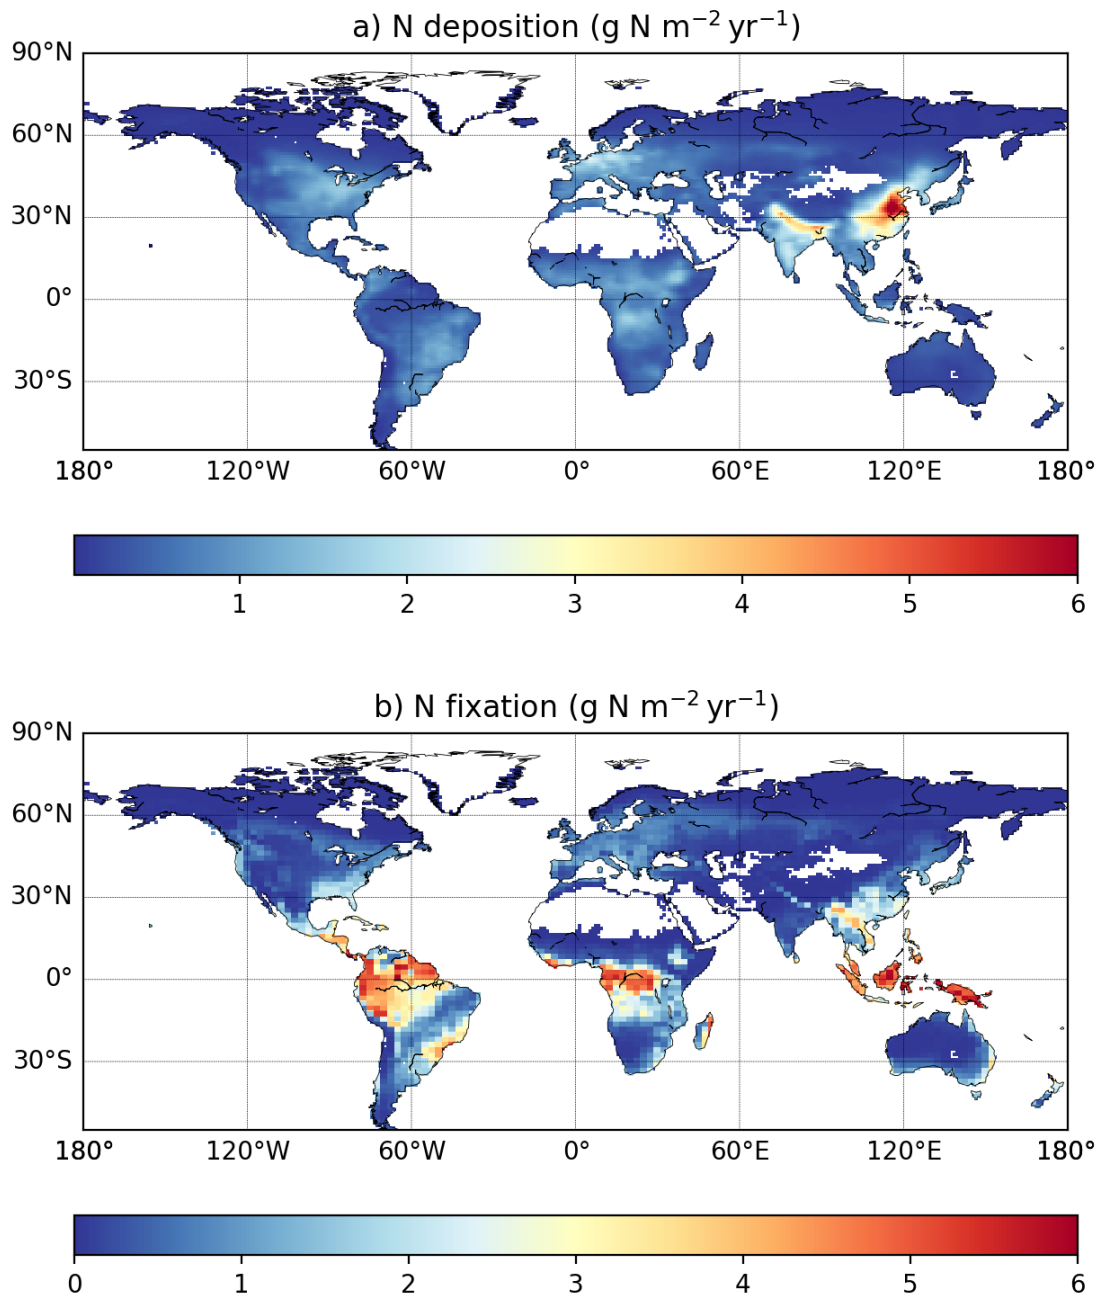

**Fig. S2** Global external N inputs. a) N deposition from Wang et al. (2017). b) N fixation from Peng et al. (submitted)

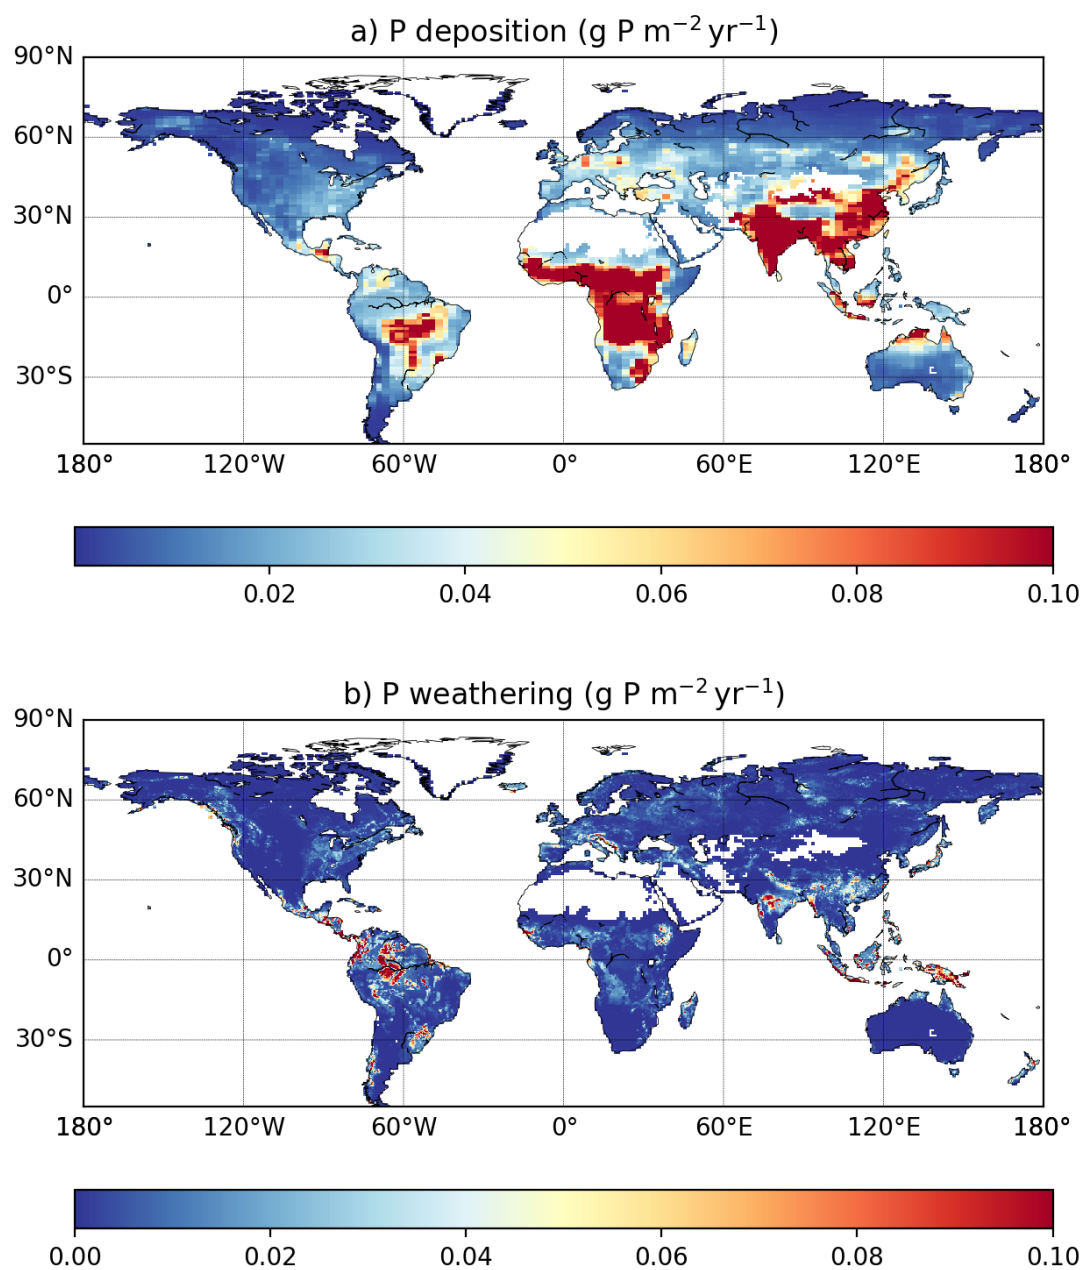

**Fig. S3** Global external P inputs. a) P deposition from Wang et al. (2017). b) Release of P from rock weathering from Hartmann et al. (2014)

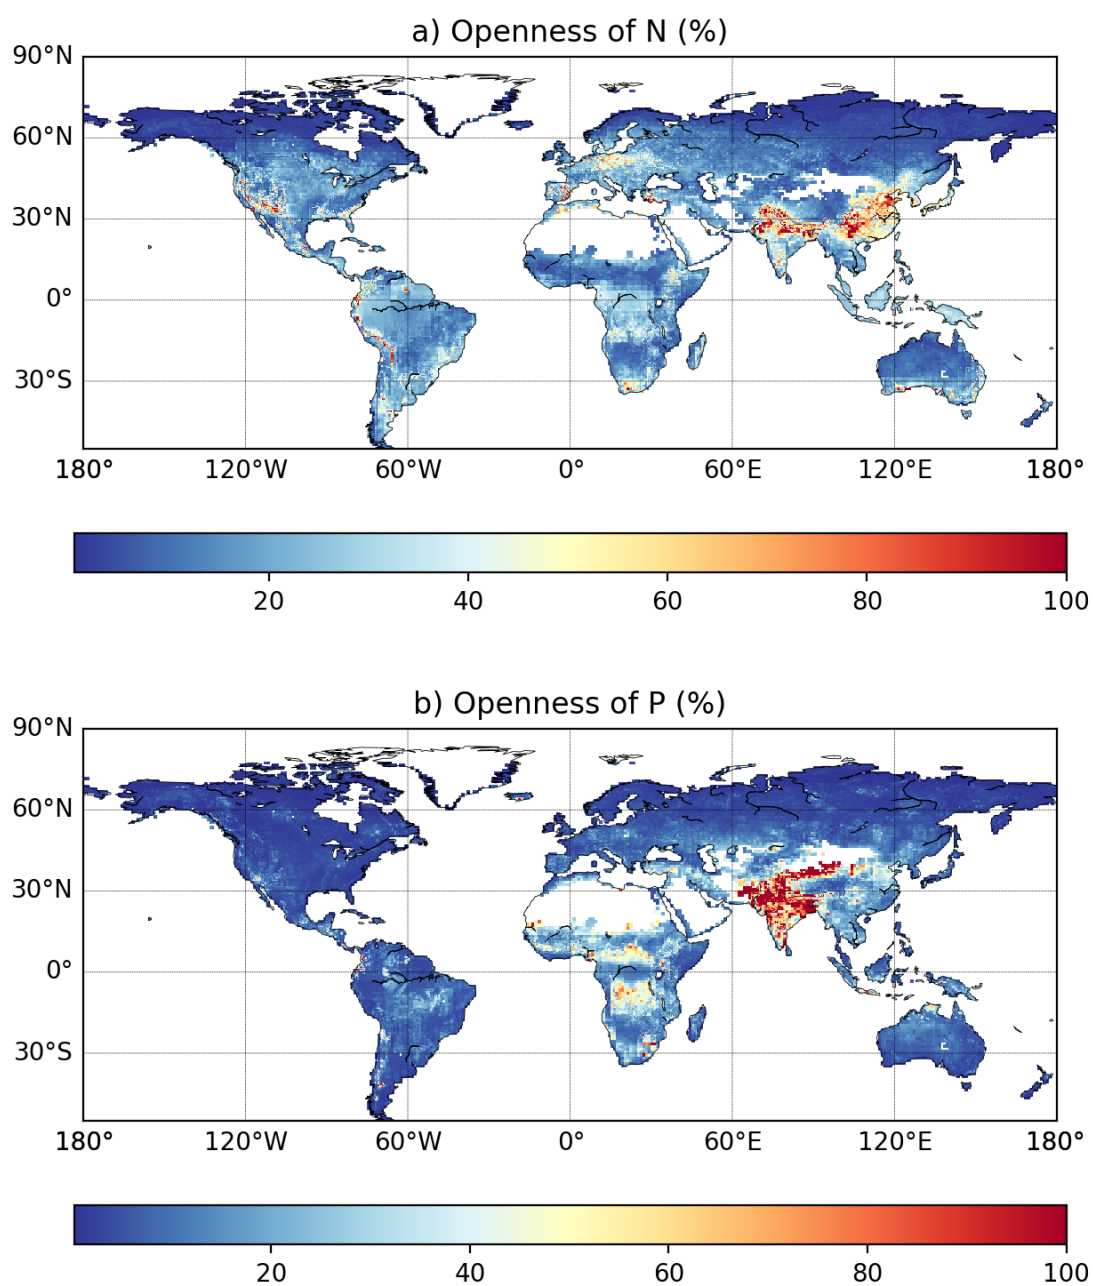

**Fig. S4** Global nutrient openness computed from GOLUM-CNP. a) Openness of N. b) Openness of P.

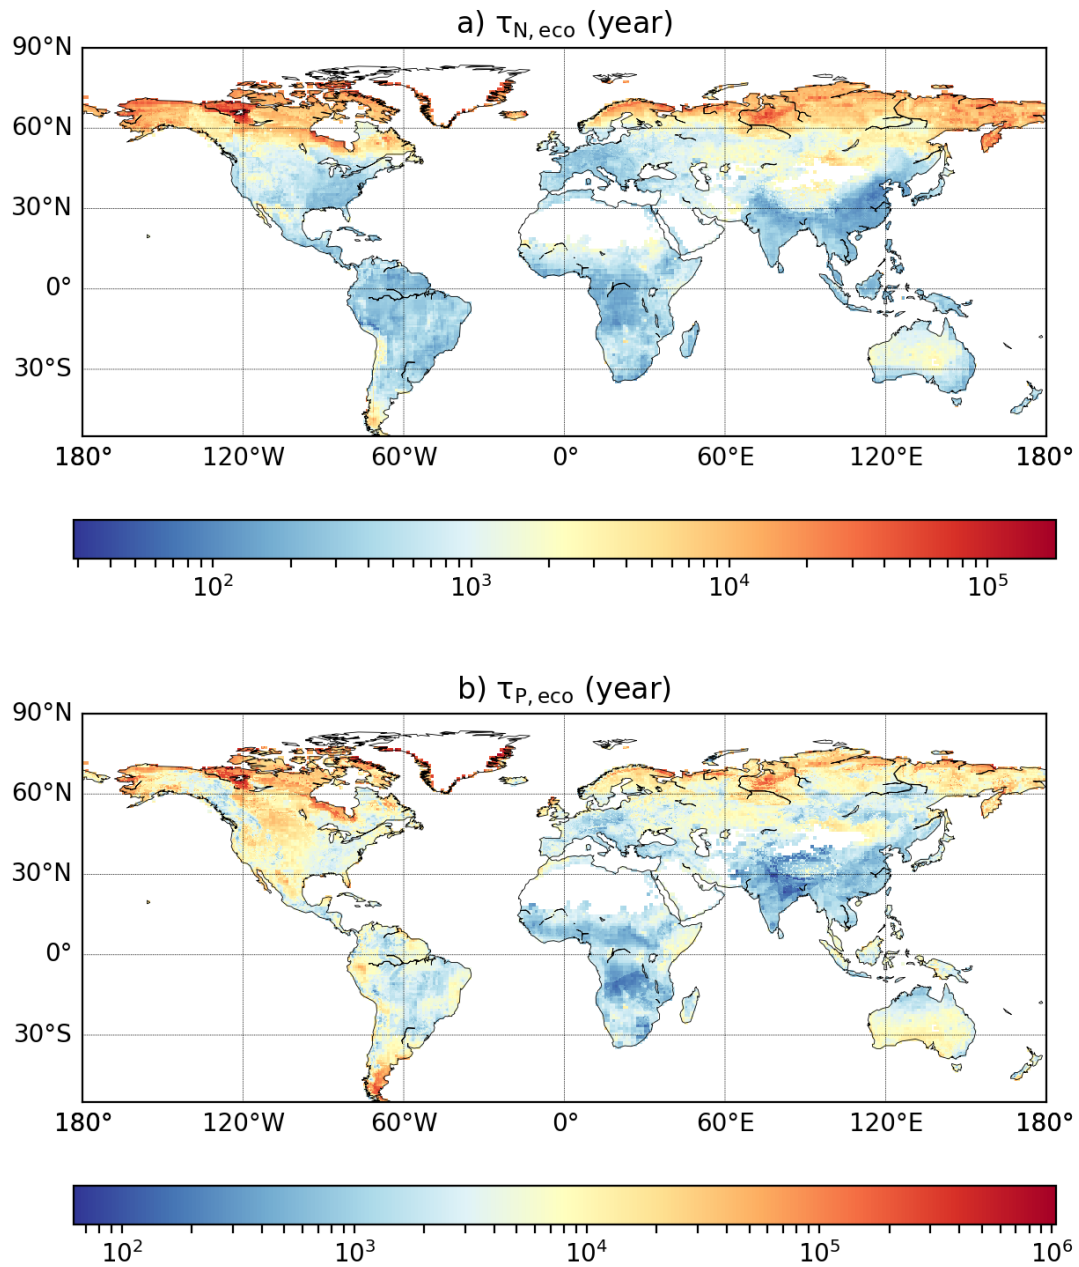

**Fig. S5** Global residence times of nutrients in the ecosystems. a) Residence times of N in the ecosystems. b) Residence times of P in the ecosystems

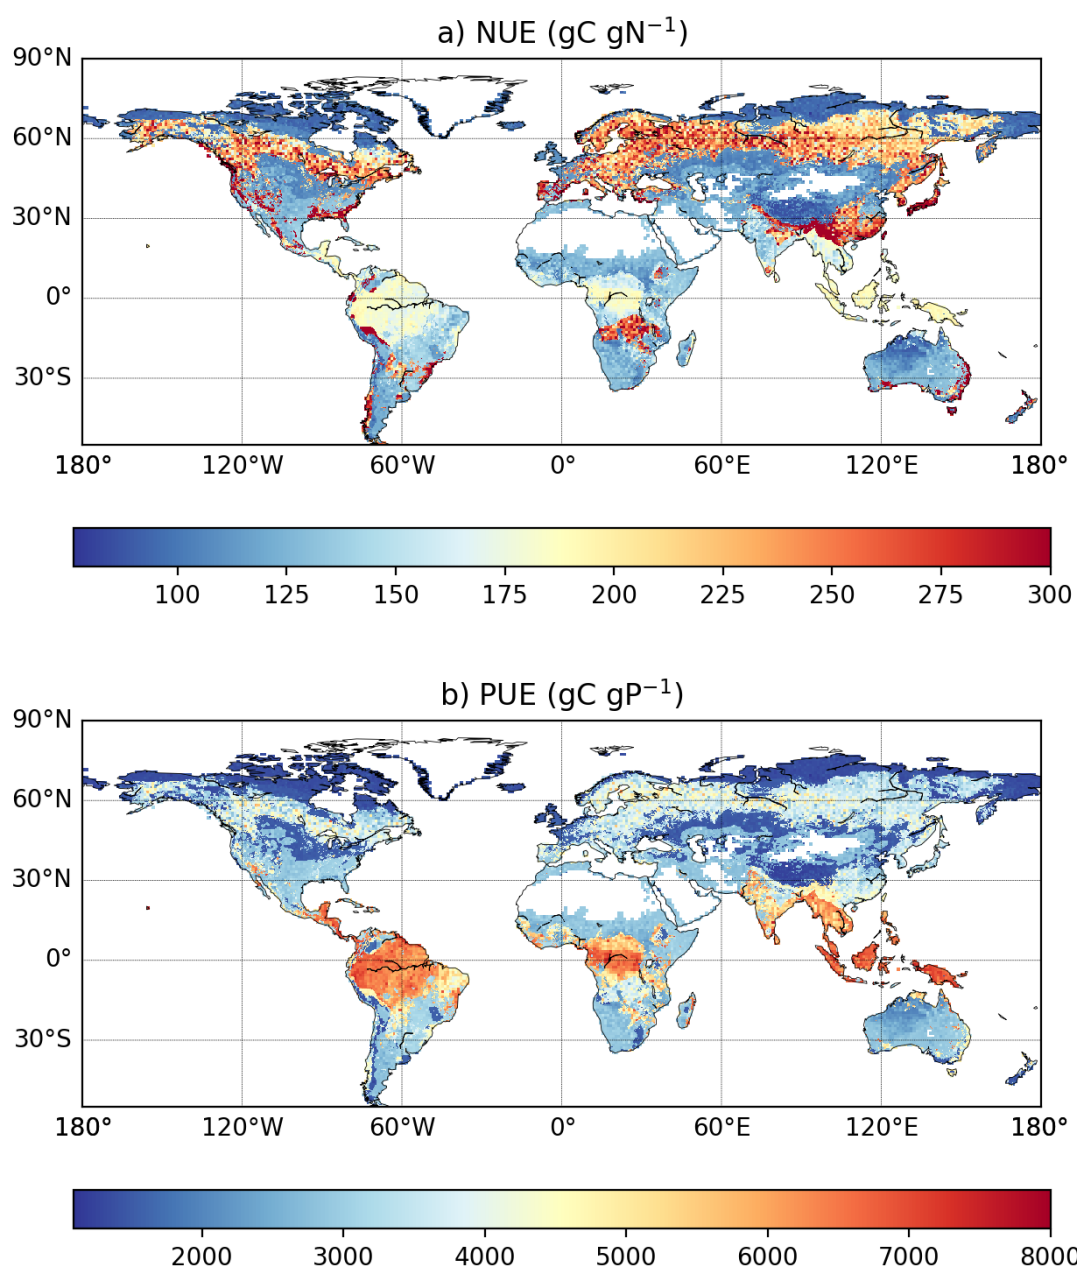

**Fig. S6** Global nutrient use efficiencies (the nutrient uptake by plants divided by GPP). a) N use efficiency. b) P use efficiency.

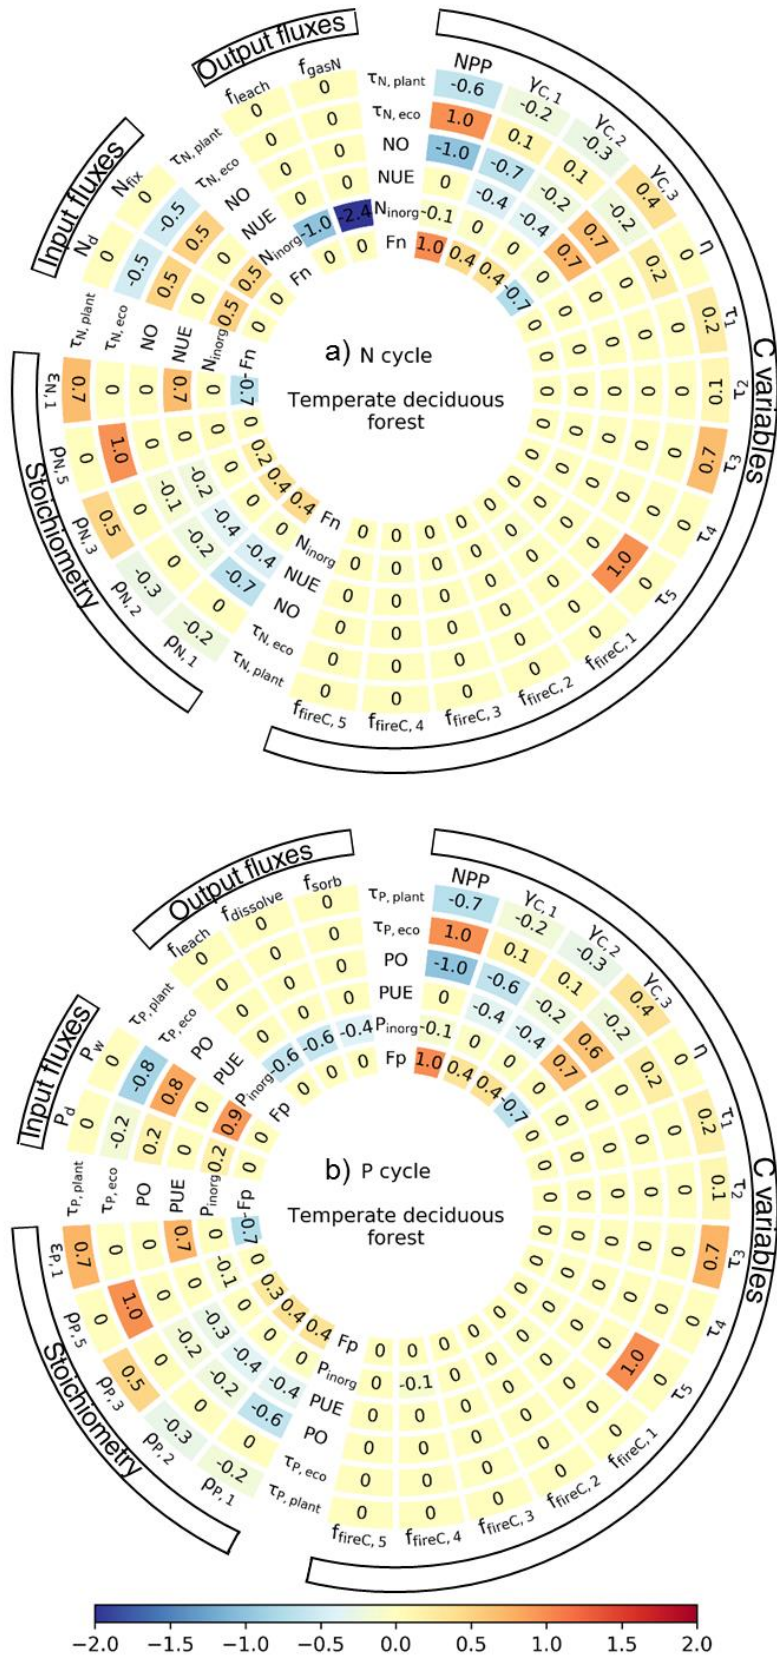

**Figure S7** Mean sensitivity of the estimates of rates of nutrient uptake, inorganic nutrients, nutrient-use efficiencies, openness, turnover time of nutrients in the ecosystem and turnover time of nutrients in plants to the input variables for temperate deciduous forests.

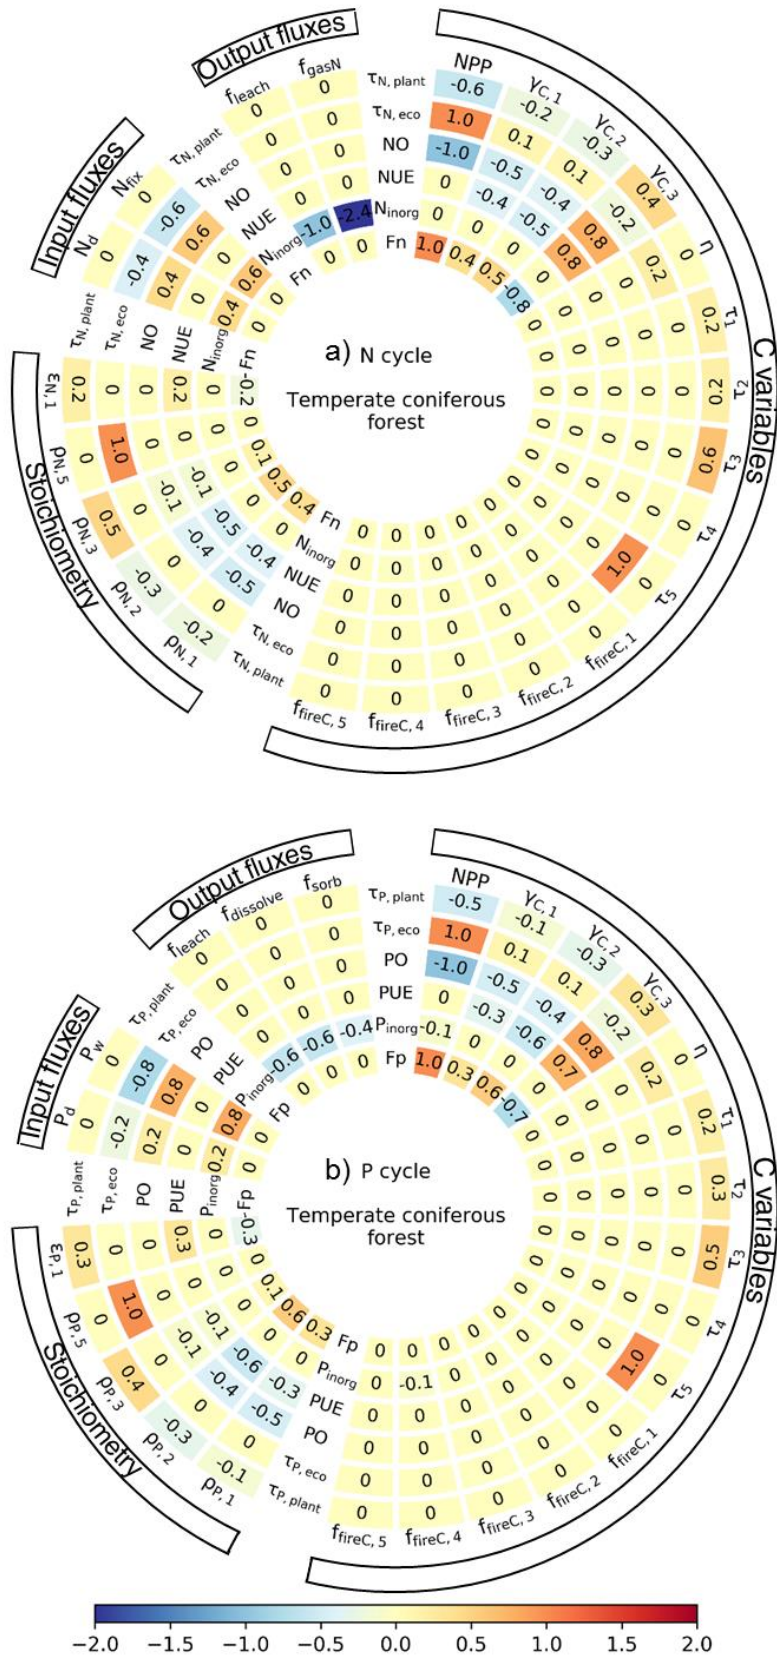

**Figure S8** Mean sensitivity of the estimates of rates of nutrient uptake, inorganic nutrients, nutrient-use efficiencies, openness, turnover time of nutrients in the ecosystem and turnover time of nutrients in plants to the input variables for temperate coniferous forests.

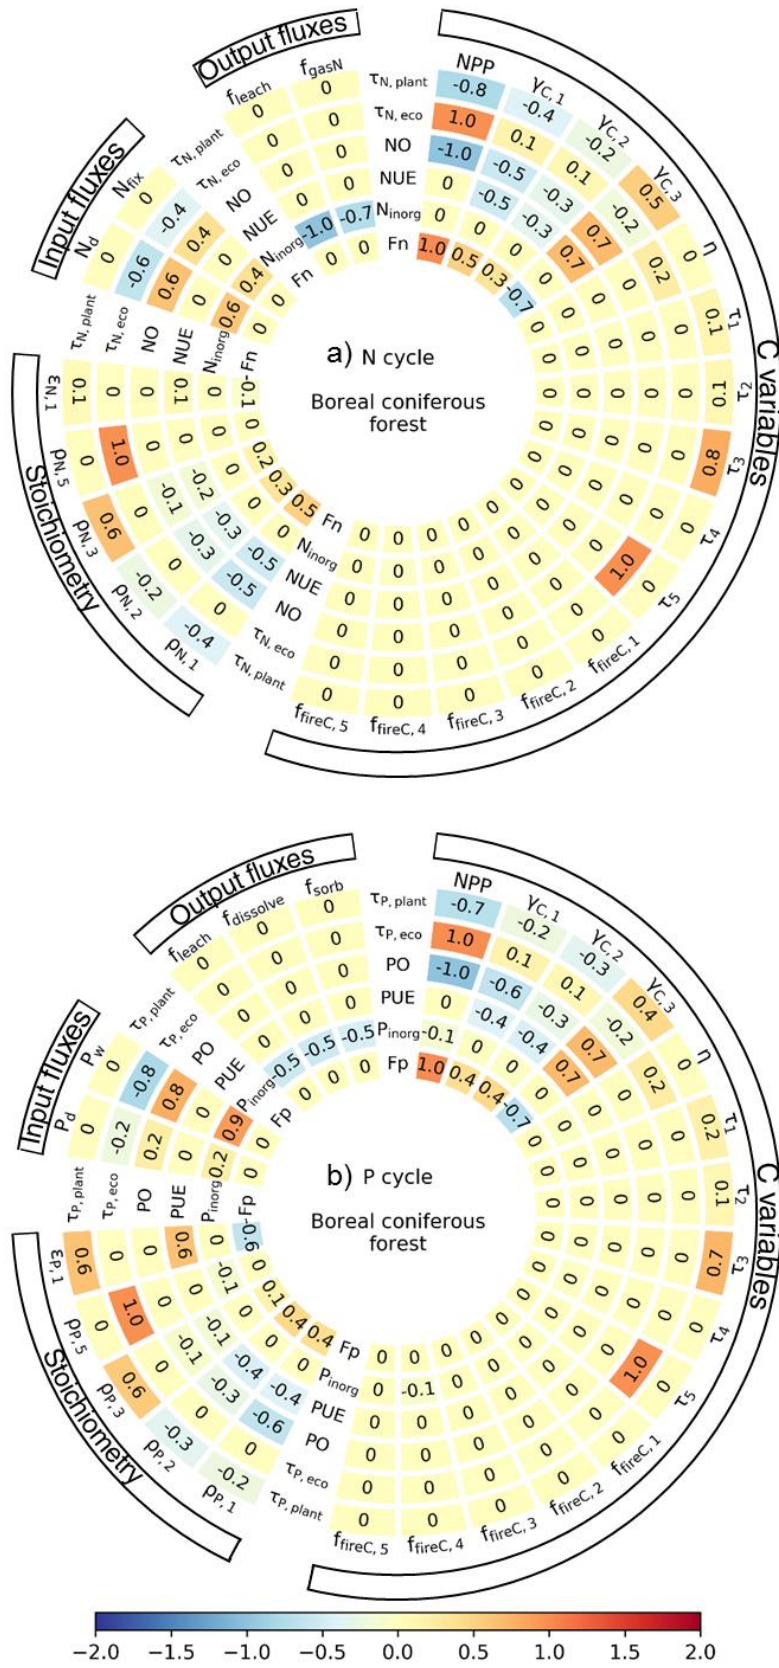

**Figure S9** Mean sensitivity of the estimates of rates of nutrient uptake, inorganic nutrients, nutrient-use efficiencies, openness, turnover time of nutrients in the ecosystem and turnover time of nutrients in plants to the input variables for boreal coniferous forests.

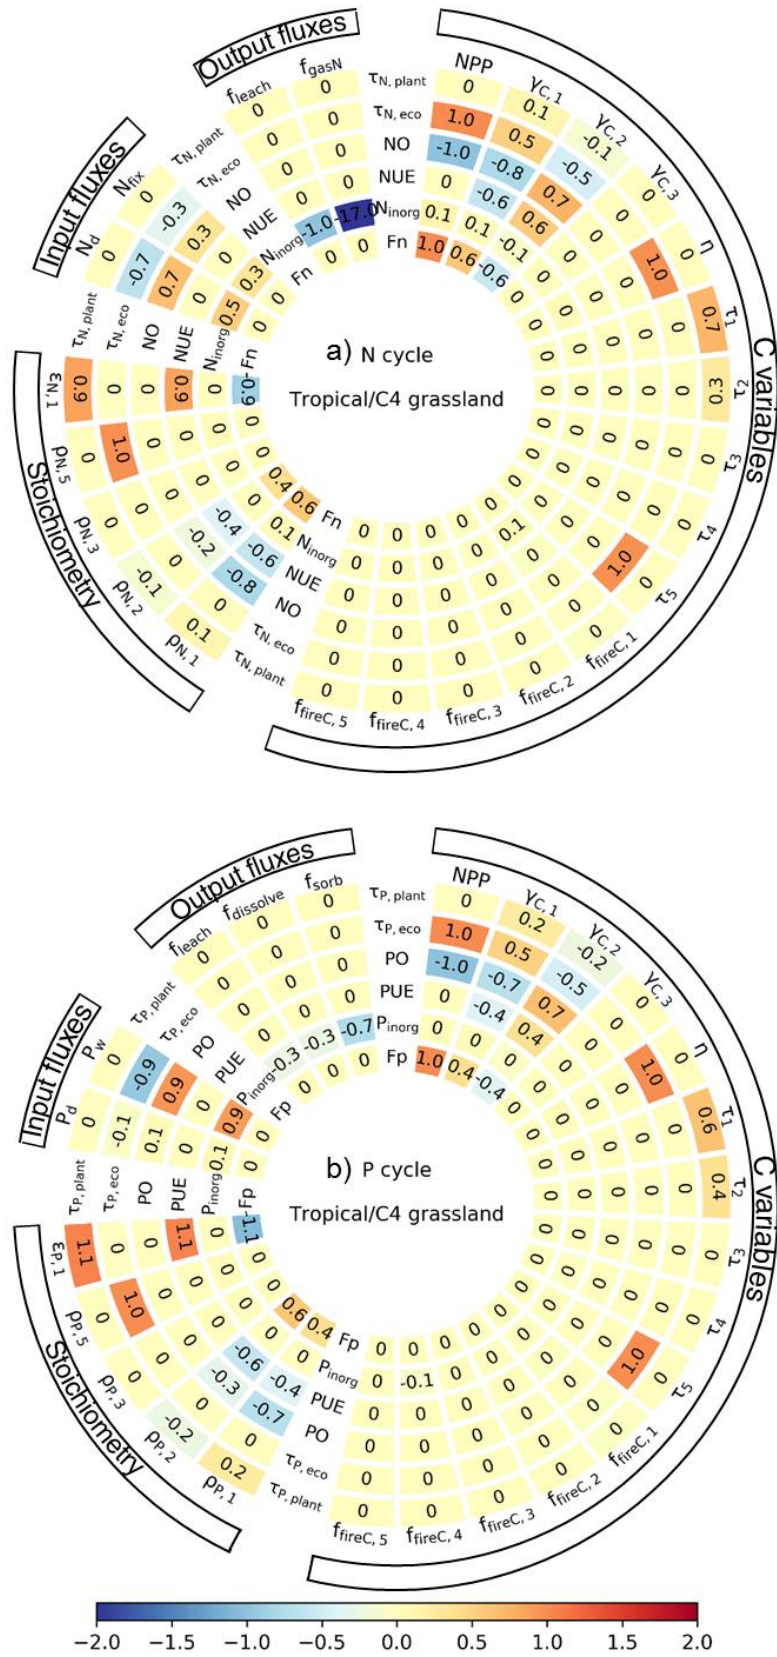

**Figure S10** Mean sensitivity of the estimates of rates of nutrient uptake, inorganic nutrients, nutrient-use efficiencies, openness, turnover time of nutrients in the ecosystem and turnover time of nutrients in plants to the input variables for tropical/C4 grasslands.

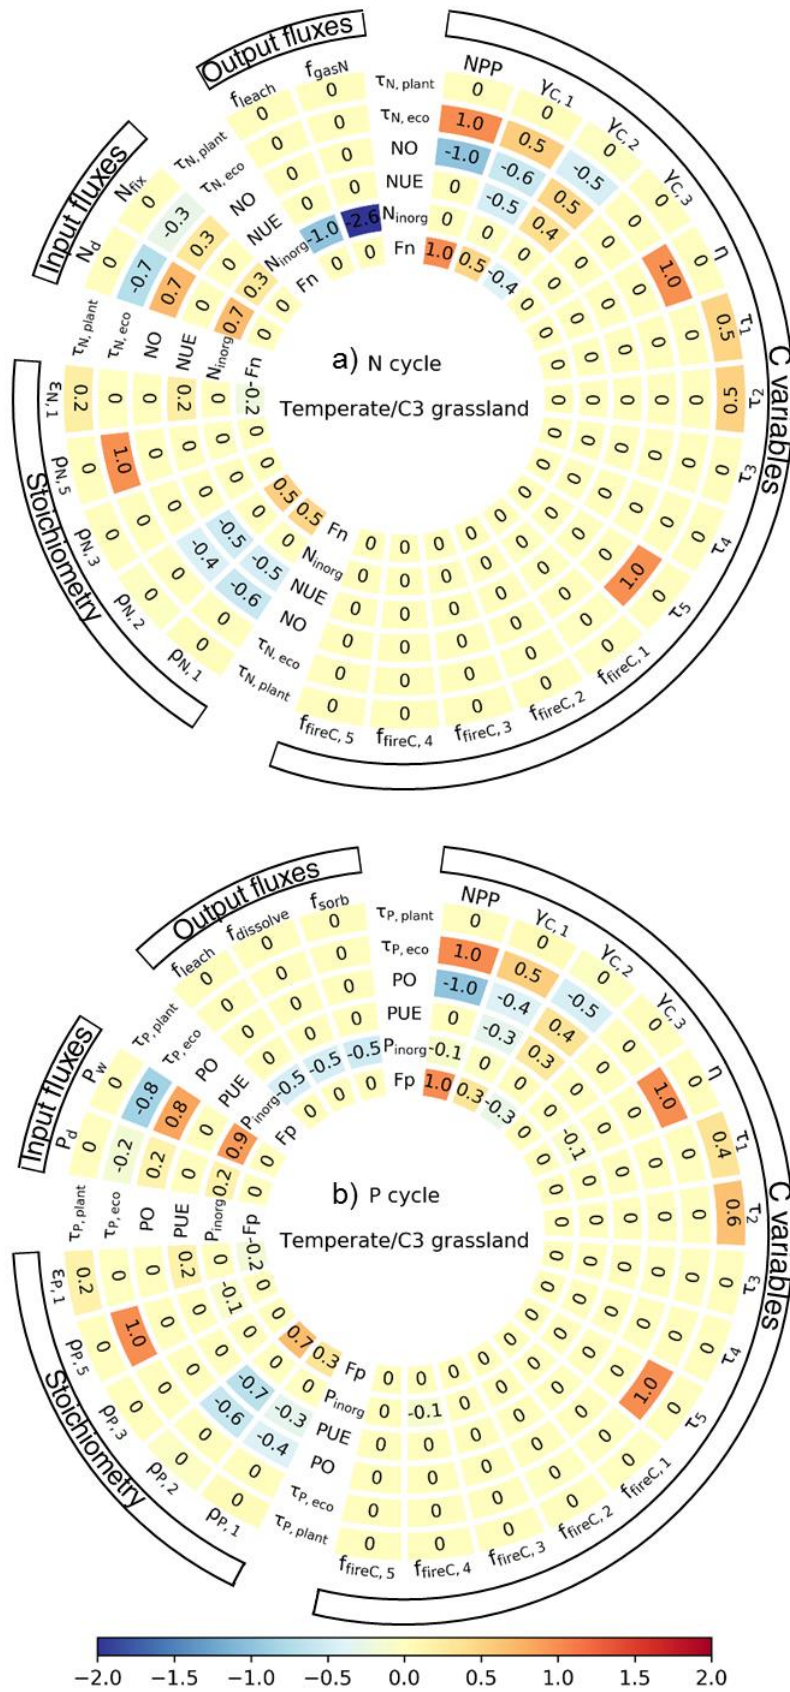

**Figure S11** Mean sensitivity of the estimates of rates of nutrient uptake, inorganic nutrients, nutrient-use efficiencies, openness, turnover time of nutrients in the ecosystem and turnover time of nutrients in plants to the input variables for temperate/C3 grasslands.

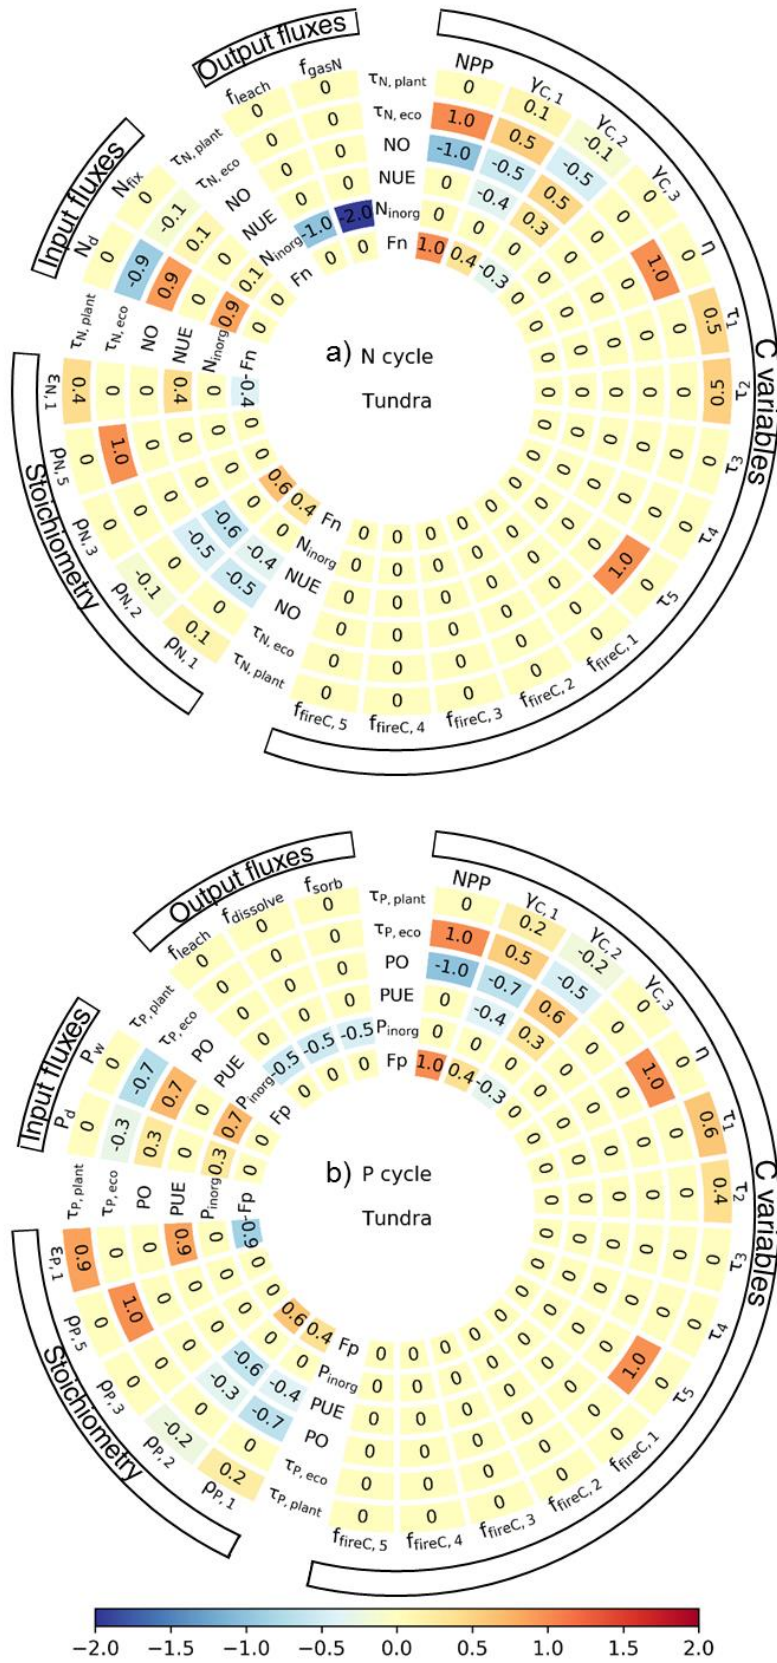

**Figure S12** Mean sensitivity of the estimates of rates of nutrient uptake, inorganic nutrients, nutrient-use efficiencies, openness, turnover time of nutrients in the ecosystem and turnover time of nutrients in plants to the input variables for tundra.

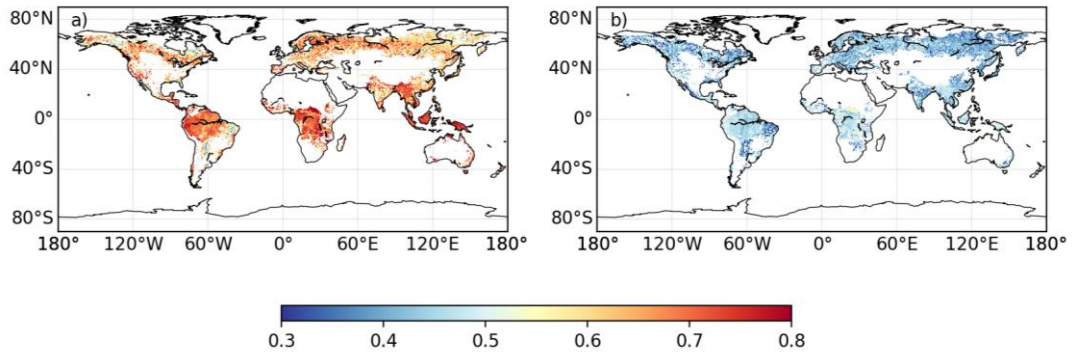

**Figure S13** NPP allocation fractions to woody biomass in original CARDAMOM (a) and adjusted (see Sect. 5.1) carbon cycle model (b).

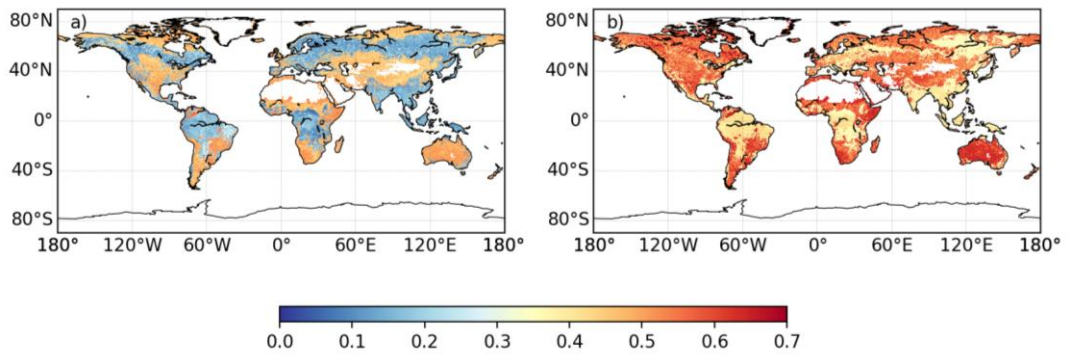

**Figure S14** NPP allocation fractions to fine roots in original CARDAMOM (a) and adjusted (see Sect. 5.1) carbon cycle model (b).

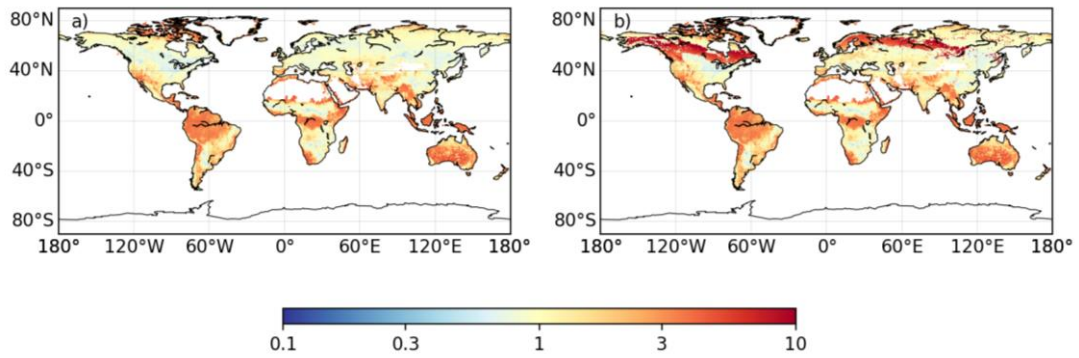

**Figure S15** Leaf longevity in original CARDAMOM (a) and adjusted (see Sect. 5.1) carbon cycle model (b).

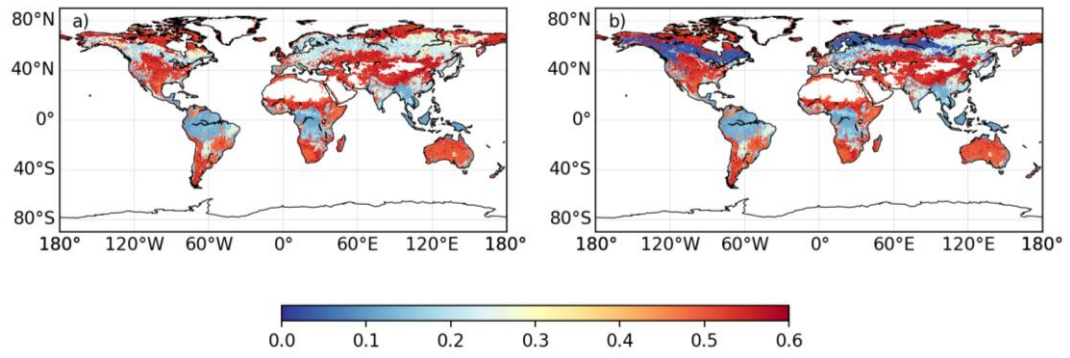

**Figure S16** NPP allocation fractions to foliage in original CARDAMOM (a) and adjusted (see Sect. 5.1) carbon cycle model (b).
