# Supplementary material for: GOLUM-CNP v1.0: a data-driven modeling of carbon, nitrogen and phosphorus cycles in major terrestrial biomes
Source: Copernicus journal article supplement (doi:10.5194/gmd-11-3903-2018), 2018-09-27
Supplement: Supplementary file 1 [file gmd-11-3903-2018-supplement.zip › GOLUM-CNP_v1.0/README]

GOLUM-CNP v1.0: a data-driven modeling of carbon, nitrogen and phosphorus cycles in major terrestrial biomes

To run the model:
1. put all .py files and input files in the same directory
2. regrid the input files to 0.25x0.25 deg
3. run Globe_ss_Anal.py
